# Supplementary material for: Preparation of Fast Degradable Bio-based Polyester/thermoplastic starch Blends based on epoxidized soybean oil
Source: Research Square preprint supplement (doi:10.21203/rs.3.rs-6537225/v1), 2025-05-14
Supplement: Supplementary file 1 [file f49d4aaa797dee836585018b.docx]

Supporting information of

**Preparation of Fast Degradable Bio-based Polyester/thermoplastic starch Blends based on epoxidized soybean oil**

Yezhong Chen1,2,3#, Xuan Fei 2#, Xuejun Fu2, Yuhan Li4, Yi Zhang1※, Lijun Zhou3※,Yansheng Yin1

1 Guangdong Provincial Key Laboratory of Nanhai Microbial Mineralization Technology and Application，Guangzhou Maritime University, Guangzhou 510725, P. R. China

2 National-certified Enterprise Technology Center, Kingfa Science and Technology Co., Ltd.,, Zhuhai,510663, P. R. China

3 Qingdao Univ Sci & Technol, Key Lab Rubber Plast, Minist Educ, Shandong Prov Key Lab Rubber Plast, Qingdao 266042, P. R. China

4 College of Chemistry and Pingyuan Laboratory, Zhengzhou Key Laboratory of Elastic Sealing Materials, Zhengzhou University, Zhengzhou 450001, P. R. China.

* Corresponding Author:

Yi Zhang, [zhangyizzdx@163.com](mailto:zhangyizzdx@163.com)

Lijuan Zhou, 03280@qust.edu.cn

Guangzhou “Yangcheng Scholar” Leading Talent Training Project (2024312143)

National Natural Science Foundation (52371059, 52001081).

1. The intrinsic viscosity of PBSSeSa-c-M composites

**Fig.** **S1** The intrinsic viscosity of PBSSeSa-c-M composites

1. The photos of blown film bubbles of PBSSeSa-c-M/TPS-ESOs composite films


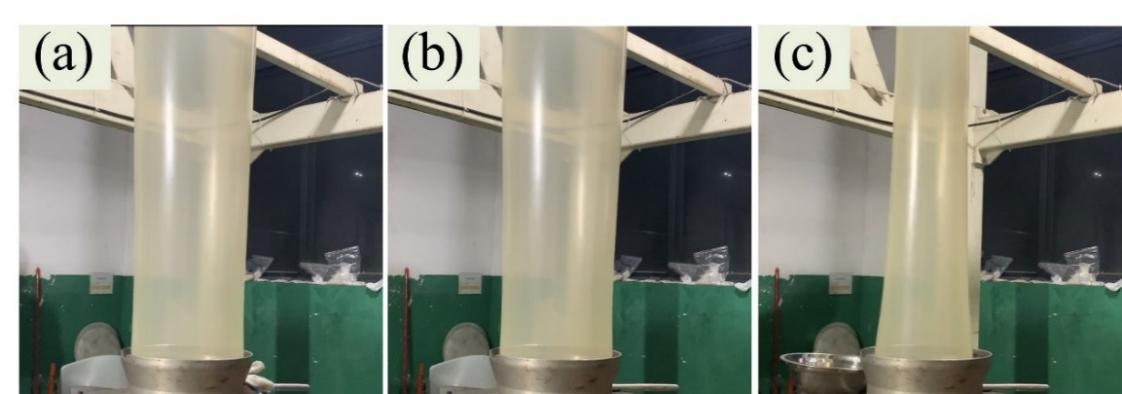


**Fig. S2** The photos of blown film bubbles of PBSSeSa-c-M/TPS-ESOs composite films: (a) PBSSeSa-c-M/TPS-ESO1; (b) PBSSeSa-c-M/TPS-ESO2; (c) PBSSeSa-c-M/TPS-ESO3.

1. The load bearing test data of films.

**Table S1** The load bearing test data of films.

| **Samples** | **Load (3kg)** | **Load (3.5kg)** | **Load (4kg)** |
| --- | --- | --- | --- |
| PBSSeSa-c-M | OK | Break | Break |
| OK | Break | Break |
| OK | Break | Break |
| PBSSeSa-c-M/TPS-MG1 | OK | Break | Break |
| OK | OK | Break |
| OK | Break | Break |
| PBSSeSa-c-M/TPS-ESO1 | OK | OK | Break |
| OK | OK | Break |
| OK | OK | Break |
| PBSSeSa-c-M/TPS-ESO2 | OK | OK | Break |
| OK | OK | Break |
| OK | OK | Break |
| PBSSeSa-c-M/TPS-ESO3 | OK | OK | Break |
| OK | OK | Break |
| OK | OK | Break |
